# Supplementary material
Source: PubMed Central journal article supplement (PMC2678636)
Supplement: 0811117106_0811117106SI.pdf [file 0811117106_0811117106SI.pdf]

# Supporting Information

Peccoud et al. 10.1073/pnas.0811117106

## SI text

To assess the reliability of Structure to correctly identify hybrids, we assigned the simulated genotypes of individuals of known parental origins. First-generation ( $F_1$ ) hybrids were generated by random allele draws from the allele frequency distributions of 2 biotypes, which were provided by the output of Structure at  $k = 11$ . “Purebreds” ( $F_0$ ) were generated by draws from the allelic frequencies of a single biotype. For assignments using the “PopInfo” model,  $F_1$ 's were randomly considered to come from either parental population (here, host plant). We simulated moderate hybridization between biotypes by adding 5  $F_1$ 's of each origin (275 genotypes for 55 types of cross) to the microsatellite data set of 1,090 real individuals. We also added 5  $F_0$ 's of each of the 11 biotypes separately, constituting another data set. The inclusion of 5 genotypes per parental origin allowed

us to assign a sufficient number of generated genotypes per run, which did not visibly alter the ancestry values of real individuals.

In these data sets, assignment tests indicated better performance of the PopInfo method of Structure, compared to the admixture model [supporting information (SI) Fig. S4A].

Forty similar data sets with different simulated genotypes (100 for each parental origin) were then created to better estimate the risk of assignment errors by the PopInfo method. The most common error, which occurred in less than 3% of the generated genotypes, was the assignment of an  $F_1$  to a single one of its parental biotypes (i.e., with an ancestry value of  $\geq 90\%$ ) and thus a possible attribution as an  $F_0$  (Fig. S4B). By contrast, almost all  $F_0$ 's were assigned to a single cluster by Structure. We concluded that the assignment method was unlikely to overestimate hybridization.











Table S1. Individual ancestries and genetic differentiation in 11 biotypes of the pea aphid

|   |             | Biotype     |             |             |             |             |             |             |            |           |           |
|---|-------------|-------------|-------------|-------------|-------------|-------------|-------------|-------------|------------|-----------|-----------|
|   | J           | E           | H           | K           | D           | C           | F           | G           | A          | B         | I         |
| J | <b>84</b>   |             |             |             |             |             |             |             |            |           |           |
| E | <b>1</b>    | <b>146</b>  |             |             |             |             |             |             |            |           |           |
| H |             | <b>1</b>    | <b>105</b>  |             |             |             |             |             |            |           |           |
| K |             | <b>5</b>    |             | <b>122</b>  |             |             |             |             |            |           |           |
| D | <b>1</b>    | <b>1</b>    |             |             | <b>35</b>   |             |             |             |            |           |           |
| C | <b>4</b>    |             | <b>1</b>    | <b>1</b>    |             | <b>61</b>   |             |             |            |           |           |
| F | <b>1</b>    | <b>1</b>    | <b>1</b>    | <b>1</b>    |             |             | <b>92</b>   |             |            |           |           |
| G |             |             | <b>2</b>    | <b>1</b>    |             |             | <b>1</b>    | <b>120</b>  |            |           |           |
| A |             |             |             |             |             |             |             |             | <b>110</b> |           |           |
| B |             |             |             |             |             |             |             |             |            | <b>95</b> |           |
| I |             |             |             |             |             |             |             |             |            |           | <b>93</b> |
| J | —           | <b>39.4</b> | <b>45.5</b> | <b>39.0</b> | <b>43.3</b> | <b>37.2</b> | <b>39.1</b> | <b>55.1</b> | 52.4       | 58.7      | 79.1      |
| E | <b>10.7</b> | —           | <b>31.1</b> | <b>33.1</b> | <b>47.0</b> | <b>50.7</b> | <b>57.3</b> | <b>54.9</b> | 58.9       | 69.1      | 81.2      |
| H | <b>12.4</b> | <b>7.1</b>  | —           | <b>31.5</b> | <b>62.2</b> | <b>47.5</b> | <b>56.0</b> | <b>53.4</b> | 65.6       | 75.6      | 82.4      |
| K | <b>11.1</b> | <b>8.1</b>  | <b>7.6</b>  | —           | <b>58.1</b> | <b>53.8</b> | <b>57.3</b> | <b>57.1</b> | 74.0       | 80.6      | 78.6      |
| D | <b>14.9</b> | <b>13.7</b> | <b>18.0</b> | <b>17.5</b> | —           | <b>47.2</b> | <b>58.8</b> | <b>63.3</b> | 61.8       | 57.7      | 87.3      |
| C | <b>12.9</b> | <b>14.8</b> | <b>14.3</b> | <b>16.6</b> | <b>17.9</b> | —           | <b>60.5</b> | <b>72.5</b> | 67.2       | 66.2      | 85.1      |
| F | <b>13.5</b> | <b>16.7</b> | <b>16.9</b> | <b>17.7</b> | <b>22.0</b> | <b>23.0</b> | —           | <b>53.3</b> | 62.3       | 71.4      | 85.3      |
| G | <b>18.2</b> | <b>15.4</b> | <b>14.9</b> | <b>16.5</b> | <b>21.4</b> | <b>26.2</b> | <b>19.6</b> | —           | 83.9       | 83.5      | 92.2      |
| A | 21.0        | 20.6        | 23.0        | 26.6        | 27.0        | 29.2        | 26.4        | 34.5        | —          | 69.1      | 77.9      |
| B | 23.5        | 23.5        | 26.7        | 29.0        | 25.5        | 29.1        | 30.6        | 34.8        | 32.8       | —         | 89.6      |
| I | 28.0        | 24.2        | 25.5        | 24.8        | 33.5        | 33.1        | 32.7        | 34.6        | 33.6       | 39.0      | —         |

Upper half: distribution of pea aphids (one per microsatellite genotype, see *Methods*) according to their parental origin, one generation backward, as inferred by Structure and verified by NewHybrids (see *Methods*). Individuals occupy the diagonal, except F<sub>1</sub> hybrids, which are indicated below the diagonal only. Lower half: pairwise genetic differentiation (in percent) between biotypes, computed by hierarchical analyses of molecular variance. Above diagonal: standardized  $F_{SC}$ . Below diagonal: raw  $F_{SC}$ . All  $F_{SC}$ 's are significant (20,000 bootstraps over loci). Values are shown in boldface type for host races likely belonging to the same species.

**Table S2. Dinucleotide microsatellite loci that were used in this study**

| Locus (reference)  | Primer sequences (5'–3') (see references in first column if not indicated) | Concentration used (nM) (see ref. 5 if not indicated) |
|--------------------|----------------------------------------------------------------------------|-------------------------------------------------------|
| <i>AIA09M*</i> (1) |                                                                            |                                                       |
| <i>AIB07M</i> (1)  |                                                                            |                                                       |
| <i>AIB08M</i> (1)  |                                                                            |                                                       |
| <i>AIB12M</i> (1)  | AAAACCCGTTGAAAATGGTG (F)<br>(R)                                            | 60<br>60                                              |
| <i>ApF08M*</i> (1) |                                                                            |                                                       |
| <i>ApH 08M</i> (1) |                                                                            |                                                       |
| <i>ApH 10M</i> (1) |                                                                            |                                                       |
| <i>AIA12M</i> (1)  | (F)<br>(R)                                                                 | 92<br>92                                              |
| <i>AIB04M</i> (1)  | GGACTGAGGAACTCGAAACG (F)<br>(R)                                            | 60<br>60                                              |
| <i>Ap-03</i> (2)   | GCAGCAACAGCAGGTGTAAG (F)<br>(R)                                            | 60<br>60                                              |
| <i>S23</i> (3)     | (F)<br>(R)                                                                 | 92<br>92                                              |
| <i>S30</i> (3)     | CGATCCGACACAAAACACAC (F)<br>CGTTTCGACTCTGCGTTGT (R)                        | 60<br>60                                              |
| <i>S3.43*</i> (3)  | (F)<br>(R)                                                                 | 92<br>92                                              |
| <i>Sm11</i> (4)    | GGTGATGGTGGCGTGAAC (F)<br>ACAGACGGTGCCGTAGTCC (F)                          | 60<br>60                                              |
| <i>AIA12M</i> (1)  | TGTCTGATGCGCTTACGTTT (F)                                                   |                                                       |
| <i>AIB12M</i> (1)  | CGGGTGCAGGGTATAAGGTA (F)                                                   |                                                       |
| <i>ApH 10M</i> (1) | TTGCTGACGACTTCAACTGC (R)                                                   |                                                       |

The first 14 loci correspond to the multiplexes that were used for genotyping and the last 3 rows corresponds to the flanking regions that were sequenced (SI Fig. S2). The second multiplex (loci *AIA12M* to *Sm11*) was used as in ref. 5, with an annealing temperature of 60°C. F, forward primer; R, reverse primer. \*, locus suspected to have null alleles (see *Methods*).

1. Caillaud MC, et al. (2004) Microsatellite DNA markers for the pea aphid *Acyrtosiphon pisum*. *Mol Ecol Notes* 4(3):446–448.
2. Kurokawa T, Yao I, Akimoto SI, Hasegawa E (2004) Isolation of six microsatellite markers from the pea aphid, *Acyrtosiphon pisum* (Homoptera, Aphididae). *Mol Ecol Notes* 4(3):523–524.
3. Wilson ACC, et al. (2004) Cross-species amplification of microsatellite loci in aphids: assessment and application. *Mol Ecol Notes* 4(1):104–109.
4. Simon JC, et al. (1999) Reproductive mode and population genetic structure of the cereal aphid *Sitobion avenae* studied using phenotypic and microsatellite markers. *Mol Ecol* 8(4):531–545.
5. Peccoud J, et al. (2008) Host range expansion of an introduced insect pest through multiple colonizations of specialized clones. *Mol Ecol* 17(21):4608–4618.
